# Supplementary material for: Brain Hemodynamic Intermediate Phenotype Links Vitamin B12 to Cognitive Profile of Healthy and Mild Cognitive Impaired Subjects
Source: Hindawi journal article supplement (doi:10.1155/2019/6874805), 2019-06-02
Supplement: f2 [file 6874805.f2.pdf]

## Supplementary 2

### Complete list of the members and affiliations of the Train the Brain Consortium

L. Maffei<sup>1</sup>, E. Picano<sup>2</sup>, M.G. Andreassi<sup>2</sup>, A. Angelucci<sup>1</sup>, F. Baldacci<sup>3</sup>, L. Baroncelli<sup>1</sup>, T. Begenisic<sup>1</sup>, P.F. Bellinvia<sup>2</sup>, N. Berardi<sup>1</sup>, L. Biagi<sup>4</sup>, J. Bonaccorsi<sup>1</sup>, E. Bonanni<sup>3</sup>, U. Bonuccelli<sup>3</sup>, A. Borghini<sup>2</sup>, C. Braschi<sup>1</sup>, M. Broccardi<sup>1</sup>, R.M. Bruno<sup>2,6</sup>, M. Caleo<sup>1</sup>, C. Carlesi<sup>1,3</sup>, L. Carnicelli<sup>3</sup>, G. Cartoni<sup>3</sup>, M.C. Cenni<sup>1</sup>, R. Ceravolo<sup>3</sup>, L. Chico<sup>3</sup>, S. Cintoli<sup>1,3</sup>, G. Cioni<sup>4,6</sup>, M. Coscia<sup>1</sup>, M. Costa<sup>1</sup>, G. D'Angelo<sup>3</sup>, P. D'Ascanio<sup>7</sup>, M. De Nes<sup>2</sup>, S. Del Turco<sup>2</sup>, E. Di Coscio<sup>7</sup>, M. Di Galante<sup>7</sup>, N. di Lascio<sup>2</sup>, F. Faita<sup>2</sup>, I. Falorni<sup>1,3</sup>, U. Faraguna<sup>4,7</sup>, A. Fenu<sup>2</sup>, L. Fortunato<sup>2</sup>, R. Franco<sup>1</sup>, L. Gargani<sup>2</sup>, R. Gargiulo<sup>1</sup>, L. Ghiadoni<sup>3</sup>, F.S. Giorgi<sup>3</sup>, R. Iannarella<sup>3</sup>, C. Iofrida<sup>5</sup>, C. Kusmic<sup>2</sup>, F. Limongi<sup>1</sup>, M. Maestri<sup>3</sup>, M. Maffei<sup>2,6</sup>, S. Maggi<sup>1</sup>, M. Mainardi<sup>1</sup>, L. Mammana<sup>1</sup>, A. Marabotti<sup>3</sup>, V. Mariotti<sup>7</sup>, E. Melissari<sup>5</sup>, A. Mercuri<sup>2</sup>, S. Micera<sup>8,9</sup>, S. Molinaro<sup>2</sup>, R. Narducci<sup>1</sup>, T. Navarra<sup>2</sup>, M. Noale<sup>1</sup>, C. Pagni<sup>3</sup>, S. Palumbo<sup>5</sup>, R. Pasquariello<sup>4</sup>, T. Pizzorusso<sup>1</sup>, A. Poli<sup>1</sup>, L. Pratali<sup>2</sup>, A. Retico<sup>10</sup>, G. Rota<sup>5</sup>, A. Sale<sup>1</sup>, S. Sbrana<sup>2</sup>, G. Scabia<sup>6</sup>, M. Scali<sup>1</sup>, D. Scelfo<sup>4</sup>, R. Sicari<sup>2</sup>, G. Siciliano<sup>3</sup>, F. Stea<sup>2</sup>, S. Taddei<sup>6</sup>, G. Tognoni<sup>3</sup>, A. Tonacci<sup>2</sup>, M. Tosetti<sup>4</sup>, S. Turchi<sup>2</sup>, L. Volpi<sup>1,3</sup>.

<sup>1</sup> Neuroscience Institute, CNR, Via G. Moruzzi 1, 56124 Pisa, Italy.

<sup>2</sup> Institute of Clinical Physiology of the CNR, Via G. Moruzzi 1, 56100 Pisa, Italy.

<sup>3</sup> Department of Clinical and Experimental Medicine-Neurology Unit, University of Pisa & AOU Pisa, Italy.

<sup>4</sup> IRCCS Stella Maris, Viale del Tirreno 341, Calambrone, Italy.

<sup>5</sup> Department of Surgical, Medical, Molecular Pathology and of Critical Care, University of Pisa, Via Savi 10, 56126 Pisa, Italy.

<sup>6</sup> Department of Clinical and Experimental Medicine, University of Pisa, Via Savi 10, 56126 Pisa, Italy.

<sup>7</sup> Department of Translational research and New technologies in Medicine and Surgery, University of Pisa, Via Savi 10, 56126 Pisa, Italy.

<sup>8</sup> Bertarelli Foundation Chair in Translational Neuroengineering, Center for Neuroprosthetics and Institute of Bioengineering, Ecole Polytechnique Federale de Lausanne, CH-1015 Lausanne, Switzerland.

<sup>9</sup> Scuola Superiore Sant'Anna, P.za Martiri della Libertà 33, 56127 Pisa, Italy.

<sup>10</sup> National Institute of Nuclear Physics (INFN), Pisa section, Largo B. Pontecorvo, 3, 56127 Pisa, Italy.
